# Supplementary material for: Differential distribution of Y-chromosome haplotypes in Swiss and Southern European goat breeds
Source: PubMed Central journal article supplement (PMC5701018; doi:10.1038/s41598-017-15593-1), 2017-11-23
Supplement: 41598_2017_15593_MOESM1_ESM.pdf [file 41598_2017_15593_MOESM1_ESM.pdf]

| Gene         | Primer | Sequence                | Location | Previous sequences:<br>Species (Sequence ID)                                                                                         | Goat regions GeneBank ID |
|--------------|--------|-------------------------|----------|--------------------------------------------------------------------------------------------------------------------------------------|--------------------------|
| <b>AMELY</b> | AMELYF | ACTTACACCTCTGAAGTGGTAT  | Exon 3   | <i>Ovis aries</i> (AY604731), <i>Bos taurus</i> (ENSBTAG00000047774)                                                                 | MF448227, MF448228       |
|              | AMELYR | CCATCCACCAACGGGTTTCATAG | Exon 4   |                                                                                                                                      |                          |
| <b>DBY</b>   | DBY1F  | ACACTGGCACTTGAATGTTG    | 3'UTR    | <i>Ovis aries</i> (AY604732), <i>Capra hircus</i> (XM_018044671)                                                                     | MF448229, MF448230       |
|              | DBY1R  | CCTTGGCATGTTATAGTTTC    | 3'UTR    |                                                                                                                                      |                          |
|              | DBY2F  | ATGGGRAACATTGARCTTAC    | Exon 7   | <i>Bos taurus</i> (ENSBTAG00000045750), <i>Homo sapiens</i> (NM_004660), <i>Sus scrofa</i> (KU705630), <i>Canis lupus</i> (JX964855) | MF448231, MF448232       |
|              | DBY2R  | GGACCATCTGWATAAATCTGAC  | Exon 8   |                                                                                                                                      |                          |
| <b>UTY</b>   | UTY1F  | ACCGAGAAGCAAGACTAAGGAAG | 5'UTR    | <i>Ovis aries</i> (AY604736), <i>Bos taurus</i> (ENSBTAG00000046123)                                                                 | MF448235                 |
|              | UTY1R  | GCCATCTTCGTGAAGGTTTCAG  | Intron 1 |                                                                                                                                      |                          |
| <b>ZFY</b>   | ZFYF   | CAGGAAATGGATGACAGTG     | Exon 5   | <i>Ovis aries</i> (SEG_AY604737S), <i>Bos taurus</i> (ENSBTAG00000007730)                                                            | MF448233, MF448234       |
|              | ZFYR   | AGCACTTGCAGTGCCACTCCGA  | Exon 6   |                                                                                                                                      |                          |

**Supplementary Table S1.** List of primers employed in the amplification and sequencing of Y-chromosome genes

| SNP         | Assay  | Forward Primer Seq.              | Reverse Primer Seq.                   | Reporter 1 Sequence      | Reporter 2 Sequence   |
|-------------|--------|----------------------------------|---------------------------------------|--------------------------|-----------------------|
| AMELY-42C>T | AMELY2 | TGCAGCCTCATCACCACATC             | GGAGTGTGGCCAGGAACTG                   | ACAGGCTGCTGAGCTG         | CAGGCTGCTAAGCTG       |
| DDX3Y-56C>G | DBYUTR | GAATGTTGAATGTCATCGTATATTACATAA   | CTGGGTTTGCTTAGCTTGACTAAAA             | AAGCTCACAGTAACCTG        | AAGCTCACACTAACCTG     |
| SRY-2971T>A | SRY1_1 | GATTGGCCATTAGTTAGATGGTAGCATAT    | GTGAGTGTTTCTGAAAGTACTATAGTTTGGA       | CACTATAGACAATAAACTTT     | CACTATAGACAATATACTTT  |
| SRY-3098G>A | SRY1_2 | TGGATGGAAAGCTCCCTACCTT           | GGTGGAAAGTAGCTAGAAAGACCAA             | AAGCACTTTCTGATACAAG      | AAGCACTTTCTGGTACAAG   |
| SRY-1876A>C | SRY2   | GGCTGCCAGGAGGTATTGAG             | GCTGTTCTTACCAGAGACTGACTT              | TTCCTGCAAATTTT           | CACTGCCAATTTT         |
| ZFY-527A>G  | ZFY1   | TTGAGGTTTATGAATGTTTTCCCCAGAT     | TGGTCCAGAAAACCTCAAATGACTGTAT          | ATTGAAAGCCATACTTGCT      | AAAGCCACACTTGCT       |
| ZFY-46C>T   | ZFY2   | AGGTTTCATTGTCATAGGTTTCAGAAATATGA | GCATAAAGTAAGTTCTATTAAAGTTAAAGACAAATGA | CAGTTTTTACTTAAATCAGTTCAC | TTTTTACTTAAATCAATTCAC |

**Supplementary Table S2.** Primers and reporters used in the genotyping assays of the Y-chromosome polymorphic positions.
